# Supplementary material for: Systematic review of health state utility values in metastatic non-small cell lung cancer with a focus on previously treated patients
Source: PubMed Central journal article supplement (PMC6134713; doi:10.1186/s12955-018-0994-8), 2018-09-12
Supplement: 12955_2018_994_MOESM3_ESM.pdf [file 12955_2018_994_MOESM3_ESM.pdf]

| Preferred sources | NICE (England and Wales)                                                                               | SMC (Scotland)                                                                            | CADTH (Canada)                                                                                                   | HAS (France)                                                                              | PBAC (Australia)                                                                                                |
|-------------------|--------------------------------------------------------------------------------------------------------|-------------------------------------------------------------------------------------------|------------------------------------------------------------------------------------------------------------------|-------------------------------------------------------------------------------------------|-----------------------------------------------------------------------------------------------------------------|
| Health state      | • EQ-5D <sup>2</sup>  | • EQ-5D  | • PBM                           | • PBM  | • MAUI                       |
| Valuation         | • TTO in UK<br>       | • TTO or SG                                                                               | • TTO, SG and VAS in Canada<br> |                                                                                           | • TTO or SG in Australia<br> |

| Back-up sources | NICE (England and Wales)                                                                                                 | SMC (Scotland)                                                                                                                 | CADTH (Canada)                                                                            | HAS (France)                                                                                           | PBAC (Australia)                                                                                                            |
|-----------------|--------------------------------------------------------------------------------------------------------------------------|--------------------------------------------------------------------------------------------------------------------------------|-------------------------------------------------------------------------------------------|--------------------------------------------------------------------------------------------------------|-----------------------------------------------------------------------------------------------------------------------------|
|                 | • EQ-5D-derived HSUV<br>                | • Condition-specific HRQoL to generic PBM<br> | • SG (preferred), TTO or VAS (but not in isolation)                                       | • EQ-5D or HUI3 to generic PBM                                                                         | • Post-trial transformation to estimate HSUVs                                                                               |
|                 | • Condition-specific HRQoL to EQ-5D<br> | • TTO or SG<br>                               | • HSUVs  | • TTO or SG                                                                                            | • TTO or SG                              |
|                 |                                                                                                                          | • HSUVs                                      |                                                                                           | •  Not recommended | • Population matching using a MAUI                                                                                          |
|                 |                                                                                                                          | • HSUVs                                     |                                                                                           |                                                                                                        | • Condition-specific HRQoL to MAUI<br> |
|                 |                                                                                                                          |                                                                                                                                |                                                                                           |                                                                                                        | • HSUVs                                |

|                                                                                     |                      |
|-------------------------------------------------------------------------------------|----------------------|
|  | Patients             |
|  | Caregivers/others    |
|  | General population   |
|  | Published literature |
|  | Mapping function     |
